# Supplementary material
Source: publisher figshare collection journal article supplement (https://frontiersin.figshare.com/ndownloader/files/33933197)
Supplement: Supplementary file 1 [file 33933197]

Supplementary Material

**Supplementary Material 1.** Questionnaire targeting the reintroduction project’s coordinators or researchers directly involved in these projects

Dear participant, this form is part of a research project entitled as “Human Dimensions of Brazilian birds’ reintroductions”. The objective is to analyze how some of the main Brazilian bird reintroduction programs approach the human dimensions of the interactions between people and birdlife in its different phases. The estimated time to fulfill the questionnaire is about 30 minutes. You can interrupt your participation at any time, no explanations are needed.

Do you agree to participate?

( ) Yes ( ) No

**Section 1: About your personal role in the reintroduction project/program**

1. What phase of the reintroduction process did you participate in, is it happening, or is it still going to happen?

(  ) It already happened. When? ______ (month/year)

      (  ) It is happening.

      (  ) It is going to happen. When? ______  (month/year)

1. What is(was) your role in the program?
2. How long have you been participating (or how long have you participated if it had already been completed) in the reintroduction project/program? (open answer, numbers only) _____
3. The reintroduction project/program makes or made part of your assignments in the institution you work for?

( ) It is part of my assignments in the present.

( ) It was part of my assignments in the past.

1. Do you or did you receive specific remuneration to work in the project/program?

( ) Yes.

( ) No.

( ) I prefer not to answer.

**Section 2: Reintroduction Project/Program Identification**

2.1. Which is the species focus of the project/program that you work(ed) for?

2.2. How many are(were) the institutions involved in the project/program? (Include the national and international institutions).

( ) 1 a 5 ( ) 6 a 10 ( ) 11 a 15 ( ) 16 a 20     ( ) 21 or more

2.3. The project/program is(was) sponsored by (you can choose more than one option):

( ) Federal government

( ) State government

( ) National research funding institutions

( ) International research funding institutions

( ) Non-governmental institutions

(  ) Private companies

( ) I do not know

(  ) Others.

**Section 3.** **Human Dimensions in the project/program**

Human Dimensions here are understood as individual and/or social factors related to the reintroductions, such as knowledge, attitudes, beliefs, experiences, acceptance about the reintroduction, behaviors, between others.

3.1. The communities that live in the sites where the species was (or will be) reintroduced participated (or its participation is predicted) somehow in the process of the focus species reintroduction?

(  ) Yes ( ) No     (   ) I don’t know (    ) It doesn’t apply

3.2. What is the frequency of the actions written below, and designed to include human dimensions, occurred (or will occur) in the reintroduction project/program?

The answer can vary between: Never/ Once at least/ Up to five times/ Between six and 10 times/ More than 10 times.

__________ interviews with residents of the project/program sites

__________ interviews with other stakeholders

__________ project/program participation on communitarian events in the cities of the project/program coverage area

__________ project/program lectures and participation on local school activities

__________ meetings with local residents to discuss the reintroduction project/program

__________ meetings with other stakeholders to discuss the reintroduction project/program

3.3. Did some other action involving local residents or other groups happen, but it was not previously listed? If yes, what was(were) this(these) action(s)?

3.4. What were the phases of the project/program destined to include actions of human dimensions? You can choose more than one option.

( ) pre-release

( ) next to the releasing time

( ) post-release

( ) it didn’t happen

3.5. Were interviewees able to express their appreciation for the focus species?

( ) Yes ( ) No  (     ) I don’t know   (    ) It doesn’t apply

3.6. Were interviewees able to express their empiric knowledge about the focus species?

( ) Yes ( ) No  (     ) I don’t know   (    ) It doesn’t apply

3.7. How was (or is predicted to be) the local community participation in the reintroduction project/program? (Open question - long answer)

3.8. About local community involvement in the reintroduction project/program of the focus species, you:

( ) Totally disagree

( ) Disagree

( ) Nor disagree, nor agree

( ) Agree

( ) Totally agree

3.9. How do you think the local community can POSITIVELY impact the reintroduction of the focus species? (Open question - long answer)

3.10. How do you think the local community can NEGATIVELY impact the reintroduction of the focus species? (Open question - long answer)

3.11. In your own opinion, what are the three greatest challenges for the successful reintroduction of the focus species? (Open question - long answer)

3.12. In the case that an interview was carried out with residents of the reintroduction sites, for the questionnaire building, the project/program team: (You can choose more than one option)

(  ) based the questionnaire on protocols from other reintroduction projects/programs. Which ones? _____________________________________

(  ) built their own questionnaire protocol

( ) felt difficulty in building the questionnaire protocol. What kind of difficulties? _______________________________________________________________

(     ) modify the questionnaire protocols according to the project/program phases

(   ) it doesn’t apply

***

Name:

Gender: (    ) M      (    ) F      (    ) Other (     ) I prefer not to answer

Age: (____) (years)

What is your academic degree?

Which institution are you linked to?
